# Supplementary material for: Occupational Exposure to Pesticides and the Incidence of Lung Cancer in the Agricultural Health Study
Source: PubMed Central journal article supplement (PMC5381995; doi:10.1289/ehp456), 2016-07-06
Supplement: EHP456.s001.acco.pdf [file EHP456.s001.acco.pdf]

**Note to readers with disabilities:** *EHP* strives to ensure that all journal content is accessible to all readers. However, some figures and Supplemental Material published in *EHP* articles may not conform to [508 standards](#) due to the complexity of the information being presented. If you need assistance accessing journal content, please contact [ehp508@niehs.nih.gov](mailto:ehp508@niehs.nih.gov). Our staff will work with you to assess and meet your accessibility needs within 3 working days.

## **Supplemental Material**

### **Occupational Exposure to Pesticides and the Incidence of Lung Cancer in the Agricultural Health Study**

Matthew R. Bonner, Laura E. Beane Freeman, Jane A. Hoppin, Stella Koutros, Dale P. Sandler, Charles F. Lynch, Cynthia J. Hines, Kent Thomas, Aaron Blair, and Michael C.R. Alavanja

#### **Table of Contents**

**Table S1.** Lung cancer risk among applicators by lifetime exposure-days of indicated pesticide, stratified by smoking status, Agricultural Health Study

**Table S2.** Lung cancer risk among applicators by lifetime exposure-days of indicated pesticide, stratified by histology, Agricultural Health Study

**Table S3.** Hazard ratios and 95% confidence limits for lung cancer by lifetime days of pesticide exposure and intensity-weighted lifetime exposure to 30 pesticides, Agricultural Health Study

**Table S1. Lung Cancer risk among applicators by lifetime exposure-days of indicated pesticide, stratified by smoking status, Agricultural Health Study**

| Pesticide by lifetime exposure-days                                  | Never Smokers |              |                         | Former Smokers |              |                         | Current Smokers |              |                         | P for Interaction |
|----------------------------------------------------------------------|---------------|--------------|-------------------------|----------------|--------------|-------------------------|-----------------|--------------|-------------------------|-------------------|
|                                                                      | Cases (n)     | Hazard Ratio | 95% confidence interval | Cases (n)      | Hazard Ratio | 95% confidence interval | Cases (n)       | Hazard Ratio | 95% confidence interval |                   |
| Chlorimuron-ethyl (herbicide; pyrimidinylsulfonyleurea) <sup>§</sup> |               |              |                         |                |              |                         |                 |              |                         |                   |
| Non-exposed                                                          | 16            | 1.0          | Referent                | 84             | 1.0          | Referent                | 80              | 1.0          | Referent                |                   |
| ≤ median                                                             | 8             | 2.17         | 0.92-5.11               | 10             | 0.58         | 0.30-1.12               | 24              | 1.09         | 0.69-1.73               |                   |
| > median                                                             | 7             | 3.80         | 1.53-9.48               | 12             | 1.22         | 0.66-2.26               | 17              | 1.10         | 0.59-1.73               |                   |
| <i>P</i> <sub>trend</sub>                                            |               | 0.001        |                         |                | 0.987        |                         |                 | 0.872        |                         | 0.107             |
| Dicamba (herbicide; benzoic acid)                                    |               |              |                         |                |              |                         |                 |              |                         |                   |
| No exposure                                                          | 27            | 1.0          | Referent                | 118            | 1.0          | Referent                | 148             | 1.0          | Referent                |                   |
| ≤ median                                                             | 13            | 0.68         | 0.35-1.32               | 32             | 0.59         | 0.40-0.87               | 38              | 0.63         | 0.44-0.90               |                   |
| > median                                                             | 7             | 0.59         | 0.25-1.38               | 32             | 0.74         | 0.50-1.10               | 42              | 0.89         | 0.63-1.25               |                   |
| <i>P</i> <sub>trend</sub>                                            |               | 0.464        |                         |                | 0.024        |                         |                 | 0.182        |                         | 0.311             |
| Pendimethalin (herbicide; dinitroaniline) <sup>§</sup>               |               |              |                         |                |              |                         |                 |              |                         |                   |
| No exposure                                                          | 20            | 1.0          | Referent                | 70             | 1.0          | Referent                | 70              | 1.0          | Referent                |                   |
| ≤ median                                                             | 8             | 1.11         | 0.49-2.54               | 18             | 0.74         | 0.44-1.25               | 28              | 0.95         | 0.61-1.48               |                   |
| > median                                                             | 2             | 0.41         | 0.10-1.80               | 20             | 1.19         | 0.72-1.99               | 35              | 1.27         | 0.82-1.96               |                   |
| <i>P</i> <sub>trend</sub>                                            |               | 0.585        |                         |                | 0.678        |                         |                 | 0.206        |                         | 0.141             |
| Carbaryl (insecticide; carbamate) <sup>§</sup>                       |               |              |                         |                |              |                         |                 |              |                         |                   |
| No exposure                                                          | 15            | 1.0          | Referent                | 42             | 1.0          | Referent                | 55              | 1.0          | Referent                |                   |
| ≤ median                                                             | 9             | 0.80         | 0.35-1.83               | 47             | 1.08         | 0.71-1.63               | 40              | 0.79         | 0.53-1.19               |                   |
| > median                                                             | 8             | 1.73         | 0.72-4.17               | 25             | 1.06         | 0.64-1.75               | 28              | 1.11         | 0.69-1.76               |                   |
| <i>P</i> <sub>trend</sub>                                            |               | 0.538        |                         |                | 0.509        |                         |                 | 0.856        |                         | 0.612             |
| Carbofuran (insecticide; carbamate)                                  |               |              |                         |                |              |                         |                 |              |                         |                   |
| No exposure                                                          | 40            | 1.0          | Referent                | 127            | 1.0          | Referent                | 169             | 1.0          | Referent                |                   |
| ≤ median                                                             | 6             | 0.48         | 0.20-1.14               | 27             | 0.80         | 0.53-1.21               | 36              | 0.87         | 0.60-1.24               |                   |
| > median                                                             | 2             | 0.30         | 0.07-1.23               | 23             | 1.21         | 0.77-1.90               | 26              | 0.89         | 0.58-1.36               |                   |
| <i>P</i> <sub>trend</sub>                                            |               | 0.049        |                         |                | 0.927        |                         |                 | 0.586        |                         | 0.213             |

**Table S1 (continued). Lung Cancer risk among applicators by lifetime exposure-days of indicated pesticide, stratified by smoking status.**

| Pesticide by lifetime exposure-days                       | Never Smokers |              |                         | Former Smokers |              |                         | Current Smokers |              |                         | P for Interaction |
|-----------------------------------------------------------|---------------|--------------|-------------------------|----------------|--------------|-------------------------|-----------------|--------------|-------------------------|-------------------|
|                                                           | Cases (n)     | Hazard Ratio | 95% confidence interval | Cases (n)      | Hazard Ratio | 95% confidence interval | Cases (n)       | Hazard Ratio | 95% confidence interval |                   |
| Chlordane (insecticide; chlorinated organic) <sup>§</sup> |               |              |                         |                |              |                         |                 |              |                         |                   |
| No exposure                                               | 20            | 1.0          | Referent                | 69             | 1.0          | Referent                | 80              | 1.0          | Referent                |                   |
| ≤ median                                                  | 9             | 1.98         | 0.90-4.36               | 18             | 0.99         | 0.59-1.67               | 21              | 1.47         | 0.91-2.38               |                   |
| > median                                                  | 1             | 0.36         | 0.05-2.70               | 12             | 1.01         | 0.55-1.87               | 12              | 1.27         | 0.69-2.34               |                   |
| <i>P</i> <sub>trend</sub>                                 |               | 0.889        |                         |                | 0.750        |                         |                 | 0.348        |                         | 0.343             |
| Chlorpyrifos (insecticide; phosphorothioate)              |               |              |                         |                |              |                         |                 |              |                         |                   |
| No exposure                                               | 41            | 1.0          | Referent                | 138            | 1.0          | Referent                | 160             | 1.0          | Referent                |                   |
| ≤ median                                                  | 8             | 0.57         | 0.27-1.22               | 47             | 1.03         | 0.74-1.43               | 51              | 0.92         | 0.67-1.26               |                   |
| > median                                                  | 5             | 0.43         | 0.17-1.09               | 28             | 0.81         | 0.53-1.22               | 54              | 1.14         | 0.83-1.57               |                   |
| <i>P</i> <sub>trend</sub>                                 |               | 0.068        |                         |                | 0.670        |                         |                 | 0.864        |                         | 0.017             |
| DDT (insecticide; chlorinated organic) <sup>§</sup>       |               |              |                         |                |              |                         |                 |              |                         |                   |
| No exposure                                               | 14            | 1.0          | Referent                | 55             | 1.0          | Referent                | 71              | 1.0          | Referent                |                   |
| ≤ median                                                  | 10            | 1.56         | 0.67-3.61               | 28             | 0.87         | 0.55-1.37               | 24              | 1.01         | 0.63-1.61               |                   |
| > median                                                  | 6             | 1.85         | 0.68-5.02               | 20             | 1.22         | 0.72-2.06               | 19              | 1.06         | 0.62-1.80               |                   |
| <i>P</i> <sub>trend</sub>                                 |               | 0.336        |                         |                | 0.881        |                         |                 | 0.965        |                         | 0.453             |
| Malathion (insecticide; phosphorothioate) <sup>§</sup>    |               |              |                         |                |              |                         |                 |              |                         |                   |
| No exposure                                               | 10            | 1.0          | Referent                | 27             | 1.0          | Referent                | 41              | 1.0          | Referent                |                   |
| ≤ median                                                  | 13            | 0.97         | 0.43-2.23               | 51             | 1.42         | 0.89-2.27               | 40              | 0.91         | 0.59-1.41               |                   |
| > median                                                  | 11            | 1.24         | 0.52-2.94               | 34             | 1.18         | 0.71-1.97               | 35              | 1.17         | 0.74-1.86               |                   |
| <i>P</i> <sub>trend</sub>                                 |               | 0.551        |                         |                | 0.596        |                         |                 | 0.299        |                         | 0.940             |

\*Hazard ratios adjusted for smoking (pack-years among current and pack-years among former smokers), age, gender, and total days of any pesticide application

<sup>§</sup>Lifetime-days of use were obtained from the take home questionnaire

**Table S2. Lung cancer risk among applicators by lifetime exposure-days of indicated pesticide, stratified by histology, Agricultural Health Study**

| Pesticide by lifetime exposure-days                                         | Adenocarcinoma |              |                         | Non-Adenocarcinoma |              |                         |
|-----------------------------------------------------------------------------|----------------|--------------|-------------------------|--------------------|--------------|-------------------------|
|                                                                             | Cases (n)      | Hazard Ratio | 95% confidence interval | Cases (n)          | Hazard Ratio | 95% confidence interval |
| <b>Chlorimuron-ethyl (herbicide; pyrimidinylsulfonyleurea) <sup>§</sup></b> |                |              |                         |                    |              |                         |
| No exposure                                                                 | 52             | 1.0          | Referent                | 128                | 1.0          | Referent                |
| ≤median                                                                     | 13             | 1.03         | 0.55-1.95               | 29                 | 0.98         | 0.65-1.48               |
| >median                                                                     | 6              | 0.77         | 0.33-1.82               | 30                 | 1.49         | 0.99-2.25               |
| <i>P</i> <sub>trend</sub>                                                   |                | 0.415        |                         |                    | 0.047        |                         |
| <b>Dicamba (herbicide; benzoic acid)</b>                                    |                |              |                         |                    |              |                         |
| No exposure                                                                 | 74             | 1.0          | Referent                | 219                | 1.0          | Referent                |
| ≤median                                                                     | 22             | 0.60         | 0.35-1.01               | 61                 | 0.61         | 0.45-0.83               |
| >median                                                                     | 24             | 0.96         | 0.63-1.48               | 57                 | 0.81         | 0.62-1.05               |
| <i>P</i> <sub>trend</sub>                                                   |                | 0.331        |                         |                    | 0.010        |                         |
| <b>Pendimethalin (herbicide; dinitroaniline) <sup>§</sup></b>               |                |              |                         |                    |              |                         |
| No exposure                                                                 | 47             | 1.0          | Referent                | 113                | 1.0          | Referent                |
| ≤median                                                                     | 12             | 0.92         | 0.62-1.36               | 42                 | 1.15         | 0.58-2.27               |
| >median                                                                     | 12             | 1.45         | 0.92-2.30               | 45                 | 0.71         | 0.34-1.48               |
| <i>P</i> <sub>trend</sub>                                                   |                | 0.677        |                         |                    | 0.138        |                         |
| <b>Carbaryl (insecticide; carbamate) <sup>§</sup></b>                       |                |              |                         |                    |              |                         |
| No exposure                                                                 | 28             | 1.0          | Referent                | 84                 | 1.0          | Referent                |
| ≤median                                                                     | 28             | 1.09         | 0.64-1.86               | 68                 | 0.91         | 0.65-1.26               |
| >median                                                                     | 14             | 1.05         | 0.55-2.04               | 47                 | 1.20         | 0.84-1.75               |
| <i>P</i> <sub>trend</sub>                                                   |                | 0.712        |                         |                    | 0.459        |                         |
| <b>Carbofuran (insecticide; carbamate)</b>                                  |                |              |                         |                    |              |                         |
| No exposure                                                                 | 91             | 1.0          | Referent                | 245                | 1.0          | Referent                |
| ≤median                                                                     | 15             | 0.62         | 0.36-1.08               | 54                 | 0.83         | 0.62-1.12               |
| >median                                                                     | 10             | 0.71         | 0.37-1.38               | 41                 | 1.00         | 0.72-1.41               |
| <i>P</i> <sub>trend</sub>                                                   |                | 0.168        |                         |                    | 0.680        |                         |
| <b>Chlordane (insecticide; chlorinated organic) <sup>§</sup></b>            |                |              |                         |                    |              |                         |
| No exposure                                                                 | 46             | 1.0          | Referent                | 123                | 1.0          | Referent                |
| ≤median                                                                     | 17             | 1.60         | 0.92-2.80               | 31                 | 1.19         | 0.80-1.76               |
| >median                                                                     | 5              | 0.73         | 0.29-1.85               | 20                 | 1.16         | 0.72-1.87               |
| <i>P</i> <sub>trend</sub>                                                   |                | 0.977        |                         |                    | 0.343        |                         |
| <b>Chlorpyrifos (insecticide; phosphorothioate)</b>                         |                |              |                         |                    |              |                         |
| No exposure                                                                 | 86             | 1.0          | Referent                | 253                | 1.0          | Referent                |
| ≤median                                                                     | 25             | 0.92         | 0.57-1.47               | 81                 | 0.96         | 0.74-1.23               |
| >median                                                                     | 20             | 0.85         | 0.51-1.41               | 67                 | 0.94         | 0.71-1.24               |
| <i>P</i> <sub>trend</sub>                                                   |                | 0.530        |                         |                    | 0.666        |                         |
| <b>DDT (insecticide; chlorinated organic) <sup>§</sup></b>                  |                |              |                         |                    |              |                         |
| No exposure                                                                 | 36             | 1.0          | Referent                | 104                | 1.0          | Referent                |
| ≤median                                                                     | 17             | 1.00         | 0.56-1.80               | 45                 | 0.99         | 0.79-1.42               |
| >median                                                                     | 15             | 1.52         | 0.82-2.84               | 30                 | 1.11         | 0.73-1.69               |
| <i>P</i> <sub>trend</sub>                                                   |                | 0.424        |                         |                    | 0.961        |                         |
| <b>Malathion (insecticide; phosphorothioate) <sup>§</sup></b>               |                |              |                         |                    |              |                         |
| No exposure                                                                 | 22             | 1.0          | Referent                | 56                 | 1.0          | Referent                |
| ≤median                                                                     | 32             | 1.07         | 0.60-1.90               | 72                 | 1.08         | 0.74-1.57               |
| >median                                                                     | 18             | 0.86         | 0.46-1.62               | 62                 | 1.31         | 0.91-1.90               |
| <i>P</i> <sub>trend</sub>                                                   |                | 0.528        |                         |                    | 0.041        |                         |

\*Hazard ratios adjusted for smoking (pack-years among current and pack-years among former smokers), age, gender, and total days of any pesticide application.

<sup>§</sup>Lifetime-days of use were obtained from the take home questionnaire

**Table S3. Hazard Ratios and 95% Confidence Limits for Lung Cancer by Lifetime Days of Pesticide Exposure and Intensity-Weighted Lifetime Exposure to 30 Pesticides, Agricultural Health Study**

| Lifetime Days Pesticide Exposure |           |               |                         |             | Intensity-Weighted Lifetime Exposure Days |           |               |                         |             |
|----------------------------------|-----------|---------------|-------------------------|-------------|-------------------------------------------|-----------|---------------|-------------------------|-------------|
| Pesticide                        | Cases (n) | Hazard* Ratio | 95% Confidence Interval | P for Trend |                                           | Cases (n) | Hazard* Ratio | 95% Confidence Interval | P for trend |
| <b>Atrazine</b>                  |           |               |                         |             |                                           |           |               |                         |             |
| Non-exposed                      | 169       | 1.00          | Ref.                    |             | Non-exposed                               | 169       | 1.00          | Ref.                    |             |
| Q1                               | 76        | 1.10          | 0.84-1.44               |             | Q1                                        | 93        | 1.25          | 0.93-1.66               |             |
| Q2                               | 119       | 0.95          | 0.73-1.24               |             | Q2                                        | 93        | 0.98          | 0.76-1.26               |             |
| Q3                               | 85        | 1.04          | 0.80-1.36               |             | Q3                                        | 87        | 0.89          | 0.68-1.17               |             |
| Q4                               | 78        | 0.84          | 0.64-1.10               | 0.177       | Q4                                        | 85        | 0.86          | 0.65-1.15               | 0.187       |
| <b>Cyanazine</b>                 |           |               |                         |             |                                           |           |               |                         |             |
| Non-exposed                      | 303       | 1.00          | Ref.                    |             | Non-exposed                               | 303       | 1.00          | Ref.                    |             |
| Q1                               | 11        | 0.95          | 0.67-1.35               |             | Q1                                        | 35        | 1.01          | 0.54-1.89               |             |
| Q2                               | 81        | 0.89          | 0.64-1.22               |             | Q2                                        | 42        | 0.87          | 0.68-1.11               |             |
| Q3                               | 28        | 0.75          | 0.53-1.05               |             | Q3                                        | 40        | 0.71          | 0.48-1.05               |             |
| Q4                               | 35        | 0.87          | 0.61-1.22               | 0.144       | Q4                                        | 38        | 0.91          | 0.63-1.30               | 0.250       |
| <b>EPTC</b>                      |           |               |                         |             |                                           |           |               |                         |             |
| Non-exposed                      | 382       | 1.00          | Ref.                    |             | Non-exposed                               | 382       | 1.00          | Ref.                    |             |
| Q1                               | 11        | 1.06          | 0.58-1.94               |             | Q1                                        | 13        | 0.66          | 0.38-1.15               |             |
| Q2                               | 26        | 0.74          | 0.50-1.11               |             | Q2                                        | 17        | 1.00          | 0.61-1.62               |             |
| Q3                               | 15        | 1.01          | 0.61-1.70               |             | Q3                                        | 23        | 1.26          | 0.83-1.92               |             |
| Q4                               | 13        | 1.08          | 0.62-1.90               | 0.602       | Q4                                        | 12        | 0.70          | 0.39-1.25               | 0.300       |
| <b>Alachlor</b>                  |           |               |                         |             |                                           |           |               |                         |             |
| Non-exposed                      | 223       | 1.00          | Ref.                    |             | Non-exposed                               | 223       | 1.00          | Ref.                    |             |
| Q1                               | 58        | 1.00          | 0.74-1.33               |             | Q1                                        | 66        | 0.99          | 0.75-1.31               |             |
| Q2                               | 84        | 0.85          | 0.66-1.10               |             | Q2                                        | 70        | 0.84          | 0.64-1.10               |             |
| Q3                               | 59        | 1.11          | 0.83-1.48               |             | Q3                                        | 60        | 1.08          | 0.81-1.43               |             |
| Q4                               | 42        | 0.78          | 0.55-1.10               | 0.285       | Q4                                        | 47        | 0.81          | 0.59-1.13               | 0.200       |
| <b>Metribuzin<sup>S</sup></b>    |           |               |                         |             |                                           |           |               |                         |             |
| Non-exposed                      | 175       | 1.00          | Ref.                    |             | Non-exposed                               | 175       | 1.00          | Ref.                    |             |
| Q1                               | 10        | 1.05          | 0.55-2.00               |             | Q1                                        | 15        | 0.93          | 0.54-1.59               |             |
| Q2                               | 39        | 0.80          | 0.57-1.14               |             | Q2                                        | 27        | 0.74          | 0.49-1.12               |             |
| Q3                               | 14        | 1.29          | 0.74-2.25               |             | Q3                                        | 19        | 1.45          | 0.90-2.34               |             |
| Q4                               | 15        | 1.17          | 0.68-2.00               | 0.611       | Q4                                        | 17        | 1.07          | 0.64-1.78               | 0.373       |
| <b>Paraquat<sup>S</sup></b>      |           |               |                         |             |                                           |           |               |                         |             |
| Non-exposed                      | 198       | 1.00          | Ref.                    |             | Non-exposed                               | 198       | 1.00          | Ref.                    |             |
| Q1                               | 10        | 1.02          | 0.50-2.08               |             | Q1                                        | 13        | 1.03          | 0.58-1.80               |             |
| Q2                               | 22        | 1.23          | 0.78-1.91               |             | Q2                                        | 15        | 1.33          | 0.75-2.35               |             |
| Q3                               | 7         | 0.98          | 0.45-2.12               |             | Q3                                        | 13        | 1.00          | 0.57-1.75               |             |
| Q4                               | 16        | 1.24          | 0.73-2.10               | 0.678       | Q4                                        | 14        | 1.35          | 0.77-2.36               | 0.537       |

| Lifetime Days Pesticide Exposure |           |               |                         |             | Intensity-Weighted Lifetime Exposure Days |           |               |                         |             |
|----------------------------------|-----------|---------------|-------------------------|-------------|-------------------------------------------|-----------|---------------|-------------------------|-------------|
| Pesticide                        | Cases (n) | Hazard* Ratio | 95% Confidence Interval | P for Trend |                                           | Cases (n) | Hazard* Ratio | 95% Confidence Interval | P for trend |
| <b>Petroleum Oil<sup>S</sup></b> |           |               |                         |             |                                           |           |               |                         |             |
| Non-exposed                      | 197       | 1.00          | Ref.                    |             | Non-exposed                               | 197       | 1.00          | Ref.                    |             |
| Q1                               | 4         | 0.79          | 0.29-2.14               |             | Q1                                        | 11        | 0.93          | 0.51-1.71               |             |
| Q2                               | 24        | 1.05          | 0.68-1.60               |             | Q2                                        | 17        | 1.11          | 0.67-1.82               |             |
| Q3                               | 11        | 1.32          | 0.72-2.42               |             | Q3                                        | 12        | 1.20          | 0.67-2.15               |             |
| Q4                               | 15        | 1.33          | 0.78-2.27               | 0.505       | Q4                                        | 14        | 1.35          | 0.78-2.34               | 0.740       |
| <b>Imazethapyr</b>               |           |               |                         |             |                                           |           |               |                         |             |
| Non-exposed                      | 318       | 1.00          | Ref.                    |             | Non-exposed                               | 318       | 1.00          | Ref.                    |             |
| Q1                               | 22        | 1.28          | 0.82-2.01               |             | Q1                                        | 25        | 0.82          | 0.54-1.26               |             |
| Q2                               | 37        | 0.73          | 0.52-1.03               |             | Q2                                        | 35        | 0.83          | 0.58-1.19               |             |
| Q3                               | 38        | 0.81          | 0.57-1.15               |             | Q3                                        | 35        | 0.90          | 0.63-1.28               |             |
| Q4                               | 38        | 0.88          | 0.62-1.24               | 0.616       | Q4                                        | 39        | 0.85          | 0.60-1.19               | 0.268       |
| <b>Glyphosate</b>                |           |               |                         |             |                                           |           |               |                         |             |
| Non-exposed                      | 92        | 1.00          | Ref.                    |             | Non-exposed                               | 92        | 1.00          | Ref.                    |             |
| Q1                               | 26        | 1.09          | 0.67-1.76               |             | Q1                                        | 104       | 1.02          | 0.75-1.38               |             |
| Q2                               | 159       | 1.12          | 0.85-1.45               |             | Q2                                        | 120       | 1.21          | 0.91-1.61               |             |
| Q3                               | 153       | 1.18          | 0.89-1.55               |             | Q3                                        | 111       | 1.26          | 0.95-1.68               |             |
| Q4                               | 101       | 1.15          | 0.85-1.55               | 0.693       | Q4                                        | 104       | 1.10          | 0.82-1.48               | 0.686       |
| <b>Butylate<sup>S</sup></b>      |           |               |                         |             |                                           |           |               |                         |             |
| Non-exposed                      | 192       | 1.00          | Ref.                    |             | Non-exposed                               | 192       | 1.00          | Ref.                    |             |
| Q1                               | 13        | 0.59          | 0.33-1.03               |             | Q1                                        | 17        | 0.77          | 0.47-1.27               |             |
| Q2                               | 22        | 1.41          | 0.90-2.20               |             | Q2                                        | 13        | 1.16          | 0.66-2.05               |             |
| Q3                               | 11        | 1.72          | 0.94-3.17               |             | Q3                                        | 12        | 1.52          | 0.84-2.72               |             |
| Q4                               | 12        | 0.98          | 0.54-1.78               | 0.842       | Q4                                        | 16        | 1.05          | 0.62-1.78               | 0.551       |
| <b>Trifluralin</b>               |           |               |                         |             |                                           |           |               |                         |             |
| Non-exposed                      | 247       | 1.00          | Ref.                    |             | Non-exposed                               | 247       | 1.00          | Ref.                    |             |
| Q1                               | 45        | 0.98          | 0.71-1.35               |             | Q1                                        | 46        | 0.86          | 0.62-1.19               |             |
| Q2                               | 78        | 0.84          | 0.65-1.09               |             | Q2                                        | 64        | 0.82          | 0.62-1.10               |             |
| Q3                               | 40        | 0.80          | 0.56-1.15               |             | Q3                                        | 50        | 0.93          | 0.68-1.26               |             |
| Q4                               | 49        | 0.72          | 0.53-1.00               | 0.136       | Q4                                        | 52        | 0.73          | 0.54-1.00               | 0.113       |
| <b>2,4-D</b>                     |           |               |                         |             |                                           |           |               |                         |             |
| Non-exposed                      | 153       | 1.00          | Ref.                    |             | Non-exposed                               | 153       | 1.00          | Ref.                    |             |
| Q1                               | 112       | 0.76          | 0.58-0.98               |             | Q1                                        | 97        | 0.77          | 0.59-1.02               |             |
| Q2                               | 97        | 0.75          | 0.58-0.97               |             | Q2                                        | 99        | 0.70          | 0.54-0.91               |             |
| Q3                               | 86        | 0.79          | 0.60-1.03               |             | Q3                                        | 87        | 0.84          | 0.64-1.09               |             |
| Q4                               | 84        | 0.74          | 0.56-0.97               | 0.41        | Q4                                        | 95        | 0.75          | 0.57-0.98               | 0.195       |

| Lifetime Days Pesticide Exposure |           |               |                         |             | Intensity-Weighted Lifetime Exposure Days |           |               |                         |             |
|----------------------------------|-----------|---------------|-------------------------|-------------|-------------------------------------------|-----------|---------------|-------------------------|-------------|
| Pesticide                        | Cases (n) | Hazard* Ratio | 95% Confidence Interval | P for Trend |                                           | Cases (n) | Hazard* Ratio | 95% Confidence Interval | P for trend |
| <b>2,4,5-T<sup>S</sup></b>       |           |               |                         |             |                                           |           |               |                         |             |
| Non-exposed                      | 187       | 1.00          | Ref.                    |             | Non-exposed                               | 187       | 1.00          | Ref.                    |             |
| Q1                               | 10        | 0.84          | 0.43-1.64               |             | Q1                                        | 14        | 0.75          | 0.43-1.32               |             |
| Q2                               | 21        | 0.71          | 0.45-1.12               |             | Q2                                        | 17        | 0.89          | 0.54-1.47               |             |
| Q3                               | 12        | 1.02          | 0.57-1.83               |             | Q3                                        | 13        | 0.68          | 0.39-1.20               |             |
| Q4                               | 16        | 1.17          | 0.70-1.96               | 0.773       | Q4                                        | 15        | 1.47          | 0.86-2.51               | 0.939       |
| <b>Permethrin (crops)</b>        |           |               |                         |             |                                           |           |               |                         |             |
| Non-exposed                      | 394       | 1.00          | Ref.                    |             | Non-exposed                               | 394       | 1.00          | Ref.                    |             |
| Q1                               | 11        | 1.18          | 0.64-2.16               |             | Q1                                        | 13        | 1.18          | 0.68-2.05               |             |
| Q2                               | 14        | 0.87          | 0.50-1.51               |             | Q2                                        | 16        | 0.82          | 0.48-1.40               |             |
| Q3                               | 18        | 0.90          | 0.54-1.50               |             | Q3                                        | 14        | 1.03          | 0.60-1.78               |             |
| Q4                               | 13        | 1.27          | 0.72-2.25               | 0.749       | Q4                                        | 13        | 1.10          | 0.62-1.96               | 0.377       |
| <b>Permethrin (animals)</b>      |           |               |                         |             |                                           |           |               |                         |             |
| Non-exposed                      | 428       | 1.00          | Ref.                    |             | Non-exposed                               | 428       | 1.00          | Ref.                    |             |
| Q1                               | 3         | 1.37          | 0.43-4.27               |             | Q1                                        | 7         | 0.62          | 0.25-1.51               |             |
| Q2                               | 6         | 0.59          | 0.23-1.50               |             | Q2                                        | 9         | 1.02          | 0.48-2.14               |             |
| Q3                               | 15        | 0.98          | 0.57-1.70               |             | Q3                                        | 9         | 0.92          | 0.45-1.86               |             |
| Q4                               | 6         | 0.65          | 0.27-1.59               | 0.718       | Q4                                        | 5         | 0.72          | 0.29-1.73               | 0.492       |
| <b>Terbufos</b>                  |           |               |                         |             |                                           |           |               |                         |             |
| Non-exposed                      | 316       | 1.00          | Ref.                    |             | Non-exposed                               | 316       | 1.00          | Ref.                    |             |
| Q1                               | 64        | 0.93          | 0.71-1.21               |             | Q1                                        | 40        | 0.89          | 0.64-1.24               |             |
| Q2                               | 30        | 0.86          | 0.59-1.26               |             | Q2                                        | 34        | 1.02          | 0.72-1.45               |             |
| Q3                               | 23        | 0.88          | 0.57-1.36               |             | Q3                                        | 34        | 0.88          | 0.62-1.26               |             |
| Q4                               | 19        | 0.84          | 0.53-1.36               | 0.34        | Q4                                        | 28        | 0.79          | 0.53-1.17               | 0.701       |
| <b>Fonofos</b>                   |           |               |                         |             |                                           |           |               |                         |             |
| Non-exposed                      | 373       | 1.00          | Ref.                    |             | Non-exposed                               | 373       | 1.00          | Ref.                    |             |
| Q1                               | 29        | 1.24          | 0.85-1.81               |             | Q1                                        | 19        | 1.22          | 0.77-1.96               |             |
| Q2                               | 17        | 0.83          | 0.51-1.36               |             | Q2                                        | 23        | 0.88          | 0.58-1.34               |             |
| Q3                               | 21        | 0.88          | 0.57-1.36               |             | Q3                                        | 24        | 0.93          | 0.62-1.41               |             |
| Q4                               | 21        | 1.20          | 0.76-1.90               | 0.858       | Q4                                        | 22        | 1.23          | 0.80-1.90               | 0.669       |
| <b>Lindane<sup>S</sup></b>       |           |               |                         |             |                                           |           |               |                         |             |
| Non-exposed                      | 213       | 1.00          | Ref.                    |             | Non-exposed                               | 213       | 1.00          | Ref.                    |             |
| Q1                               | 11        | 0.69          | 0.37-1.31               |             | Q1                                        | 8         | 0.60          | 0.29-1.28               |             |
| Q2                               | 11        | 1.19          | 0.63-2.24               |             | Q2                                        | 12        | 1.09          | 0.59-2.00               |             |
| Q3                               | 10        | 1.20          | 0.61-2.35               |             | Q3                                        | 7         | 0.94          | 0.44-2.01               |             |
| Q4                               | 5         | 1.05          | 0.43-2.58               | 0.676       | Q4                                        | 10        | 1.60          | 0.82-3.14               | 0.754       |

| Lifetime Days Pesticide Exposure |           |               |                         |             | Intensity-Weighted Lifetime Exposure Days |           |               |                         |             |
|----------------------------------|-----------|---------------|-------------------------|-------------|-------------------------------------------|-----------|---------------|-------------------------|-------------|
| Pesticide                        | Cases (n) | Hazard* Ratio | 95% Confidence Interval | P for Trend |                                           | Cases (n) | Hazard* Ratio | 95% Confidence Interval | P for trend |
| <b>Aldicarb<sup>S</sup></b>      |           |               |                         |             |                                           |           |               |                         |             |
| Non-exposed                      | 223       | 1.00          | Ref.                    |             | Non-exposed                               | 223       | 1.00          | Ref.                    |             |
| Q1                               | 5         | 2.13          | 0.85-5.31               |             | Q1                                        | 8         | 1.36          | 0.64-2.88               |             |
| Q2                               | 14        | 0.99          | 0.51-1.91               |             | Q2                                        | 5         | 1.18          | 0.48-2.92               |             |
| Q3                               | 4         | 0.80          | 0.24-2.62               |             | Q3                                        | 5         | 0.91          | 0.36-2.34               |             |
| Q4                               | 5         | 0.81          | 0.26-2.51               | 0.379       | Q4                                        | 3         | 0.72          | 0.21-2.50               | 0.504       |
| <b>Phorate<sup>S</sup></b>       |           |               |                         |             |                                           |           |               |                         |             |
| Non-exposed                      | 182       | 1.00          | Ref.                    |             | Non-exposed                               | 182       | 1.00          | Ref.                    |             |
| Q1                               | 7         | 0.74          | 0.35-1.57               |             | Q1                                        | 13        | 0.69          | 0.39-1.21               |             |
| Q2                               | 26        | 0.70          | 0.47-1.06               |             | Q2                                        | 20        | 0.71          | 0.44-1.12               |             |
| Q3                               | 16        | 1.05          | 0.63-1.75               |             | Q3                                        | 15        | 1.14          | 0.67-1.93               |             |
| Q4                               | 14        | 1.43          | 0.82-2.47               | 0.837       | Q4                                        | 15        | 1.35          | 0.79-2.29               | 0.758       |
| <b>Aldrin<sup>S</sup></b>        |           |               |                         |             |                                           |           |               |                         |             |
| Non-exposed                      | 192       | 1.00          | Ref.                    |             | Non-exposed                               | 192       | 1.00          | Ref.                    |             |
| Tertile 1                        | 7         | 1.02          | 0.48-2.18               |             | Tertile 1                                 | 17        | 0.79          | 0.48-1.30               |             |
| Tertile 2                        | 30        | 0.68          | 0.50-1.00               |             | Tertile 2                                 | 17        | 0.66          | 0.40-1.08               |             |
| Tertile 3                        | 15        | 0.81          | 0.47-1.40               | 0.535       | Tertile 3                                 | 18        | 0.81          | 0.50-1.31               | 0.173       |
| <b>Toxaphene<sup>S</sup></b>     |           |               |                         |             |                                           |           |               |                         |             |
| Non-exposed                      | 196       | 1.00          | Ref.                    |             | Non-exposed                               | 196       | 1.00          | Ref.                    |             |
| Tertile 1                        | 10        | 2.15          | 1.14-4.08               |             | Tertile 1                                 | 16        | 1.04          | 0.62-1.73               |             |
| Tertile 2                        | 29        | 1.11          | 0.75-1.64               |             | Tertile 2                                 | 17        | 1.56          | 0.94-2.57               |             |
| Tertile 3                        | 12        | 1.19          | 0.65-2.17               | 0.712       | Tertile 3                                 | 18        | 1.26          | 0.77-2.06               | 0.734       |
| <b>Coumaphos</b>                 |           |               |                         |             |                                           |           |               |                         |             |
| Non-exposed                      | 405       | 1.00          | Ref.                    |             | Non-exposed                               | 405       | 1.00          | Ref.                    |             |
| Tertile 1                        | 8         | 2.71          | 1.34-5.46               |             | Tertile 1                                 | 12        | 1.05          | 0.59-1.87               |             |
| Tertile 2                        | 22        | 1.05          | 0.69-1.62               |             | Tertile 2                                 | 15        | 1.35          | 0.80-2.25               |             |
| Tertile 3                        | 11        | 1.00          | 0.54-1.82               | 0.587       | Tertile 3                                 | 14        | 1.14          | 0.67-1.95               | 0.552       |
| <b>DDVP</b>                      |           |               |                         |             |                                           |           |               |                         |             |
| Non-exposed                      | 423       | 1.00          | Ref.                    |             | Non-exposed                               | 423       | 1.00          | Ref.                    |             |
| Tertile 1                        | 7         | 2.18          | 1.03-4.59               |             | Tertile 1                                 | 10        | 1.39          | 0.72-2.66               |             |
| Tertile 2                        | 15        | 0.63          | 0.37-1.05               |             | Tertile 2                                 | 11        | 0.56          | 0.31-1.03               |             |
| Tertile 3                        | 10        | 0.89          | 0.47-1.67               | 0.855       | Tertile 3                                 | 11        | 0.99          | 0.54-1.80               | 0.5987      |
| <b>Captan</b>                    |           |               |                         |             |                                           |           |               |                         |             |
| Non-exposed                      | 412       | 1.00          | Ref.                    |             | Non-exposed                               | 412       | 1.00          | Ref.                    |             |
| Tertile 1                        | 13        | 0.70          | 0.41-1.21               |             | Tertile 1                                 | 12        | 0.72          | 0.41-1.27               |             |
| Tertile 2                        | 15        | 1.07          | 0.58-1.96               |             | Tertile 2                                 | 154       | 1.03          | 0.59-1.81               |             |
| Tertile 3                        | 12        | 0.76          | 0.41-1.38               | 0.395       | Tertile 3                                 | 154       | 0.79          | 0.44-1.42               | 0.301       |



| Lifetime Days Pesticide Exposure      |           |               |                         |             | Intensity-Weighted Lifetime Exposure Days |           |               |                         |             |
|---------------------------------------|-----------|---------------|-------------------------|-------------|-------------------------------------------|-----------|---------------|-------------------------|-------------|
| Pesticide                             | Cases (n) | Hazard* Ratio | 95% Confidence Interval | P for Trend |                                           | Cases (n) | Hazard* Ratio | 95% Confidence Interval | P for trend |
| <b>Benomyl<sup>§</sup></b>            |           |               |                         |             |                                           |           |               |                         |             |
| Non-exposed                           | 221       | 1.00          | Ref.                    |             | Non-exposed                               | 221       | 1.00          | Ref.                    |             |
| Q1                                    | 4         | 1.10          | 0.41-2.95               |             | Q1                                        | 9         | 1.16          | 0.71-1.90               |             |
| Q2                                    | 10        | 1.00          | 0.53-1.90               |             | Q2                                        | 6         | 1.37          | 0.77-2.44               |             |
| Q3                                    | 7         | 0.86          | 0.40-1.82               |             | Q3                                        | 5         | 1.43          | 0.87-2.34               |             |
| Q4                                    | 4         | 1.25          | 0.46-3.41               | 0.003       | Q4                                        | 5         | 0.76          | 0.41-1.39               | 0.659       |
| <b>Chlorothalonil</b>                 |           |               |                         |             |                                           |           |               |                         |             |
| Non-exposed                           | 465       | 1.00          | Ref.                    |             | Non-exposed                               | 465       | 1.00          | Ref.                    |             |
| Q1                                    | 9         | 0.81          | 0.36-1.78               |             | Q1                                        | 17        | 0.73          | 0.36-1.46               |             |
| Q2                                    | 24        | 1.53          | 1.00-2.32               |             | Q2                                        | 15        | 0.80          | 0.45-1.44               |             |
| Q3                                    | 17        | 1.13          | 0.69-1.86               |             | Q3                                        | 16        | 1.08          | 0.50-2.35               |             |
| Q4                                    | 10        | 0.97          | 0.49-1.92               | 0.873       | Q4                                        | 12        | 0.83          | 0.42-1.62               | 0.932       |
| <b>Metalaxy<sup>§</sup></b>           |           |               |                         |             |                                           |           |               |                         |             |
| Non-exposed                           | 184       | 1.00          | Ref.                    |             | Non-exposed                               | 184       | 1.00          | Ref.                    |             |
| Q1                                    | 19        | 1.34          | 0.81-2.20               |             | Q1                                        | 14        | 1.13          | 0.64-1.97               |             |
| Q2                                    | 16        | 1.02          | 0.61-1.71               |             | Q2                                        | 16        | 1.20          | 0.70-2.05               |             |
| Q3                                    | 12        | 1.08          | 0.60-1.95               |             | Q3                                        | 17        | 1.13          | 0.68-1.88               | 0.758       |
| Q4                                    | 18        | 1.33          | 0.82-2.19               | 0.729       | Q4                                        | 18        | 1.30          | 0.79-2.12               |             |
| <b>Methyl Bromide</b>                 |           |               |                         |             |                                           |           |               |                         |             |
| Non-exposed                           | 403       | 1.00          | Ref.                    |             | Non-exposed                               | 403       | 1.00          | Ref.                    |             |
| Q1                                    | 20        | 1.14          | 0.73-1.79               |             | Q1                                        | 31        | 1.04          | 0.72-1.50               |             |
| Q2                                    | 44        | 1.01          | 0.74-1.37               |             | Q2                                        | 27        | 0.89          | 0.60-1.31               |             |
| Q3                                    | 30        | 1.04          | 0.71-1.50               |             | Q3                                        | 37        | 1.23          | 0.88-1.73               |             |
| Q4                                    | 28        | 1.01          | 0.68-1.49               | 0.432       | Q4                                        | 26        | 1.01          | 0.67-1.52               | 0.706       |
| <b>Ethylene Dibromide<sup>§</sup></b> |           |               |                         |             |                                           |           |               |                         |             |
| Non-exposed                           | 228       | 1.00          | Ref.                    |             | Non-exposed                               | 228       | 1.00          | Ref.                    |             |
| Q1                                    | 3         | 0.67          | 0.21-2.07               |             | Q1                                        | 5         | 0.95          | 0.39-2.30               |             |
| Q2                                    | 5         | 1.80          | 0.74-4.37               |             | Q2                                        | 5         | 2.72          | 1.12-6.64               |             |
| Q3                                    | 4         | 18.8          | 6.85-51-58              |             | Q3                                        | 6         | 2.03          | 0.90-4.58               |             |
| Q4                                    | 7         | 1.14          | 0.54-2.42               | 0.607       | Q4                                        | 3         | 0.84          | 0.27-2.62               | 0.277       |

\*Hazard ratios adjusted for age, smoking (pack-years among current and pack-years among former smokers) and gender, total lifetime pesticide use.

<sup>§</sup>Lifetime-days and Intensity-weighted lifetime Days of use were obtained from the take home questionnaire
